# Supplementary material for: Design of the patient navigator to Reduce Readmissions (PArTNER) study: A pragmatic clinical effectiveness trial
Source: PubMed Central journal article supplement (PMC6700266; doi:10.1016/j.conctc.2019.100420), 2019-07-19

**Design of the Patient Navigator to Reduce Readmissions (PARtNER) study:  
A pragmatic clinical effectiveness trial**

**Online Data Supplement**

Valentin Prieto-Centurion, MD, MS<sup>1</sup>; Sanjib Basu, MStat, PhD<sup>2</sup>; Nina Bracken, APRN<sup>3</sup>; Elizabeth Calhoun, PhD<sup>4</sup>; Carolyn Dickens, PhD, APRN<sup>1</sup>; Robert J. DiDomenico, PharmD<sup>5</sup>; Richard Gallardo, MPH<sup>3</sup>; Victor Gordeuk, MD<sup>1</sup>; Melissa Gutierrez-Kapheim, MS<sup>6</sup>; Lewis L Hsu, MD, PhD<sup>7</sup>; Sai Illendula, MS<sup>3</sup>; Min Joo, MD, MPH<sup>1</sup>; Uzma Kazmi, MPH<sup>8</sup>; Amelia Mutso, PhD<sup>1</sup>; A. Simon Pickard, PhD<sup>5</sup>; Barry Pittendrigh, PhD<sup>9</sup>; Jamie L. Sullivan, MPH<sup>10</sup>; Mark Williams, MD<sup>11</sup>; Jerry A. Krishnan, MD, PhD<sup>1,3</sup>

1. Department of Medicine, College of Medicine, University of Illinois at Chicago
2. Department of Epidemiology and Biostatistics, School of Public Health, University of Illinois at Chicago
3. Population Health Sciences Program, University of Illinois at Chicago
4. University of Arizona
5. Department of Pharmacy Practice, College of Pharmacy, University of Illinois at Chicago
6. Department of Community Health Sciences, School of Public Health, University of Illinois at Chicago
7. Department of Pediatrics, College of Medicine, University of Illinois at Chicago
8. American Academy of Sleep Medicine
9. Michigan State University
10. COPD Foundation
11. University of Kentucky

February 14, 2019

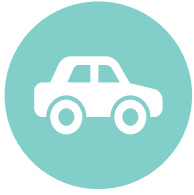

# Transportation from hospital

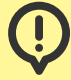

Remember to make transportation plans to and from your next doctor's appointments.

*For*

*Being picked  
up by*

*Phone #*

*Going to*

*At address*

Illinois

*Alternate  
contact(s)*

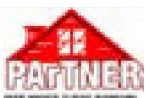

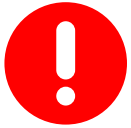

# Emergency information for

*If you need immediate help, call 9-1-1 or go to the nearest emergency department or urgent care facility.*

▶ Watch for  
signs +  
symptoms

- 
- 
- 
- 
- 
- 

▶ Take  
action

Call  
at \_\_\_\_\_ if  
has the symptoms above

*Continues on back ▶*

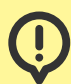

Post this page where it is easy to see in case of an emergency.  
Get updated information from your follow-up doctor at each  
follow-up appointment.

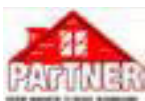

---

*Other doctor's information*

Doctor's name:

Type of doctor:

Doctor's phone #:

*Hospitalization summary*

▶ Be sure to give this information when you call

Patient name:

Medical record #:

Date of birth:

Admission date:

Discharge date:

Primary discharge diagnosis:

*Insurance information*

Insurance type:

Insurance #:

Insurance phone #:

Insurance care coordinator:

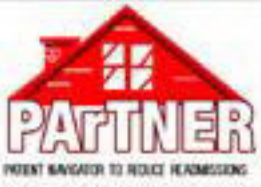

# 1 Learn about the PArTNER study + UI Health

*What's inside*

1A PArTNER study overview

1B UI Health community clinics

Consent form

*This information will help you...*

- ✓ understand the study you enrolled in
- ✓ know what clinics are available in the UI Health system

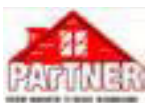

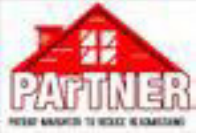

# 1A *Learn about the PArTNER study + UI Health* **PArTNER study overview**

## ▶ The problem

Many patients return to the hospital less than a month after they are discharged from the hospital.

It can be hard for patients to get back on their feet after they return home.

During this time, patients sometimes feel abandonment, anxiety, fear, or as if they can't take care of themselves as well as they would like.

## ▶ PArTNER's mission

The PArTNER study is trying to find out

- what patients need when they go home
- how hospitals can help them stay healthy during this time

## ▶ Your role in PArTNER

After you are discharged home, you will get:

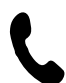

2 calls from a research coordinator.

They will ask you questions about your current health.

These calls last around 15 minutes



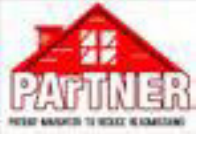

# 1A *Learn about the PArTNER study + UI Health* **PArTNER study overview**

► Your navigator  
+ peer coach

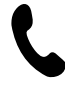

In addition to the 2 calls from a research coordinator, you will get:

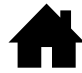

**1 home visit from your patient navigator**

Your patient navigator helps to make sure you are able to stay healthy once you leave the hospital.

## Patient navigators

Dameka Edwards  
1.312.636.3449

Emma Villarreal  
1.312.636.3429

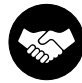

**5 calls from your peer coach (iPArTNER)** over the next 2 months. Each call lasts around 15 minutes.

Your peer coach has a condition similar to yours. They are members of one of these organizations:

- COPD Foundation
- Mended Hearts
- Sickle Cell Disease Association of Illinois

## Peer coach (iPArTNER)

1.844.iPrTNER  
(1.844.477.8637)



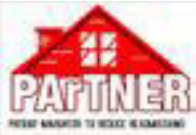

# 1B Learn about the PARTNER study + UI Health UI Health community clinics

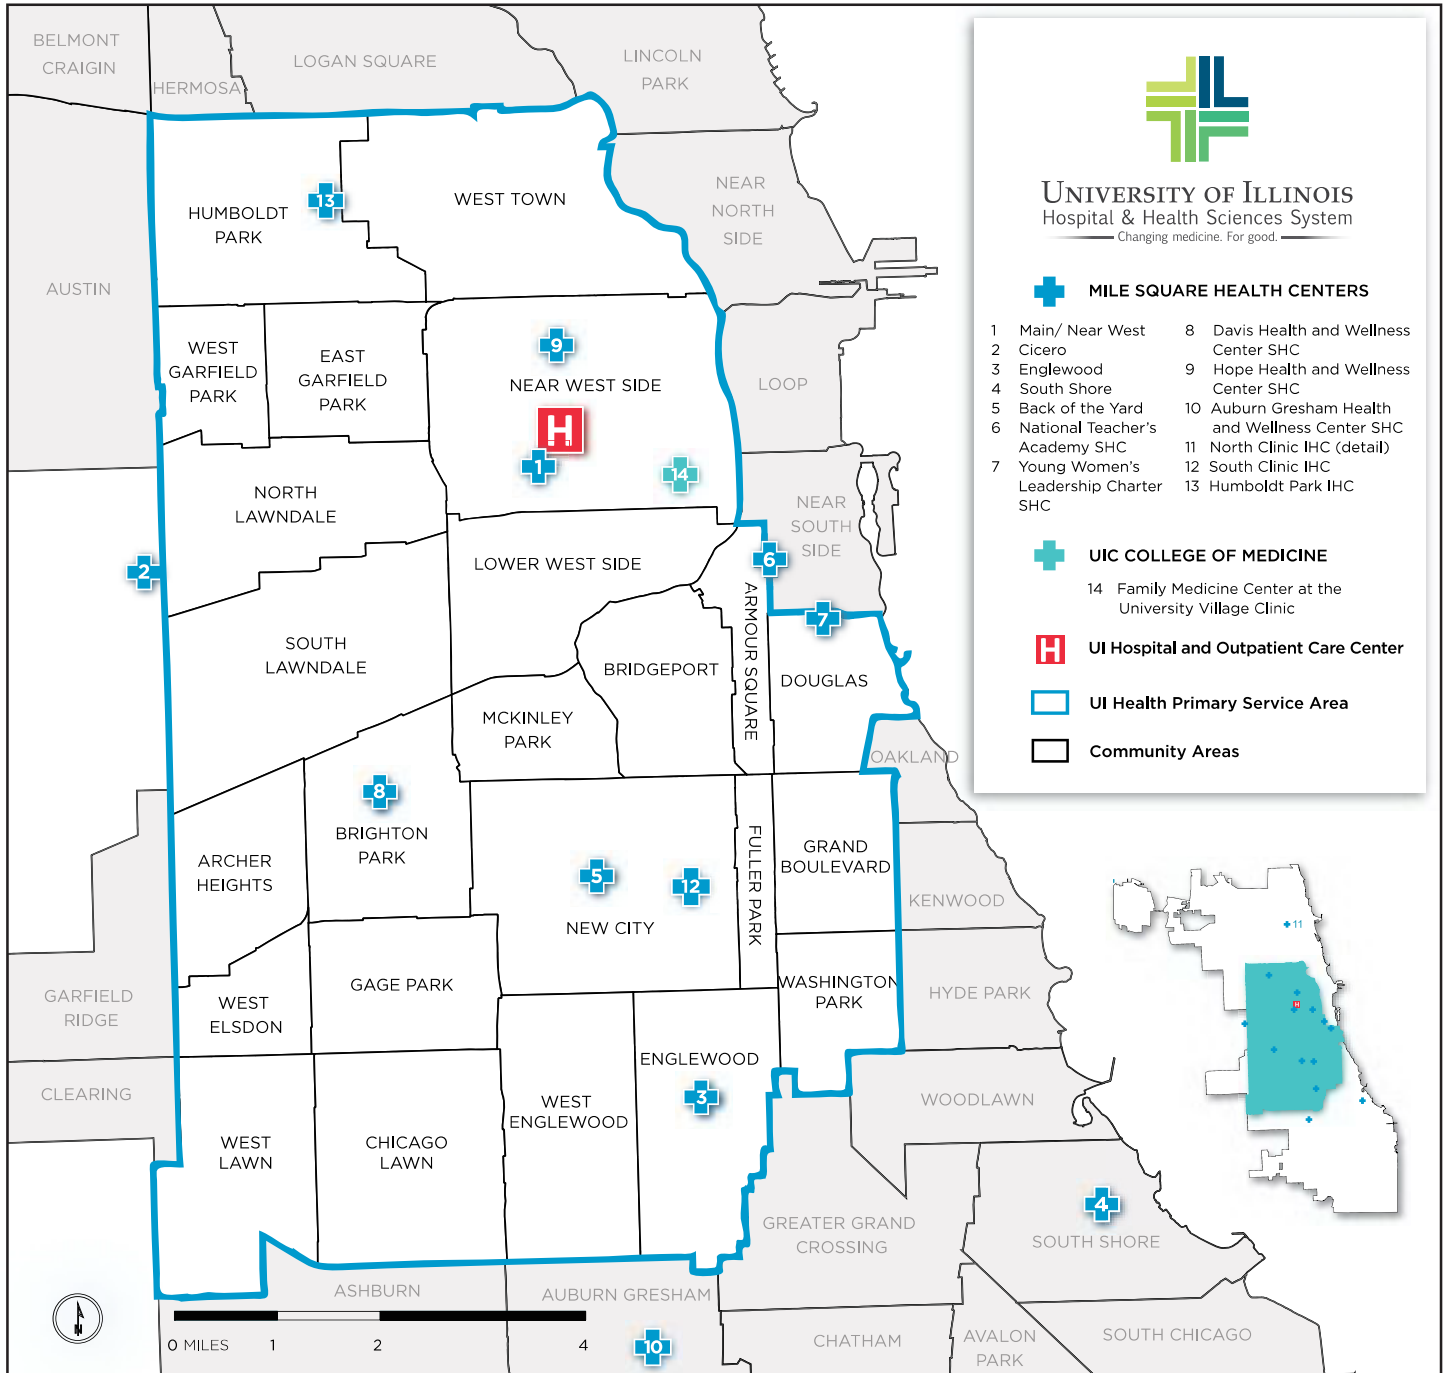

Clinic information on back ►

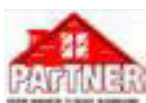



---

## Mile Square Health Centers

### 1. Main/Near west

1220 South Wood St.  
Chicago, IL 60608  
312.996.2000

Mon-Fri 9am-5pm  
Sat 8am-noon  
Sun Closed

### 2. Cicero

Hawthorne Works Shopping Center  
4745-51 West Cermak Rd.  
Cicero, IL 60804  
708.656.4766

Mon 9am-5pm  
Tues 9:30am-5:30pm  
Wed 9am-5pm  
Thurs 9am-5pm  
Fri 9am-5pm  
Sat + Sun Closed

### 3. Englewood

641 West 63rd St.  
Chicago, IL 60621  
312.413.4070

Mon-Fri 9am-5pm  
Sat + Sun Closed

### 4. South Shore

7131 S. Jeffery Blvd.  
Chicago, IL 60649

Mon + Tues 9am-5pm  
Wed 9:30am-5:30pm  
Thurs + Fri 9am-5pm  
Sat + Sun Closed

### 5. Back of the Yards

4630 South Bishop St.  
Chicago, IL 60609  
773.523.2615

Mon + Tues 8:30am-5pm  
Wed 9:30am-5:30pm  
Thurs + Fri 8:30am-5pm  
Sat 8:30am-noon  
Sun Closed

### 6. National Teachers Academy School-based Health Center

55 West Cermak Rd.  
Chicago, IL 60616  
312.326.4472

### 7. Young Women's Leadership Charter School-based Health Center

2641 South Calumet Ave.  
Chicago, IL 60616  
312.949.0277

### 8. Davis Health and Wellness Center School-based Health Center

3050 West 39th Place  
Chicago, IL 60632  
773.376.8008

### 9. Hope Health and Wellness Center School-based Health Center

1628 West Washington Blvd.  
Chicago, IL 60612  
312.226.3288

### 10. Auburn Gresham Health and Wellness Center School-based Health Center

8131 S May St.  
Chicago, IL 60620  
312.355.5801

### 11. North Integrated Health Care Clinic (detail)

4221 North Lincoln Ave.  
Chicago, IL 60618  
773.537.3950  
773.537.3020

Mon-Fri  
9am-noon, 1pm-5pm

### 12. South Integrated Health Care Clinic

734 West 47th St.  
Chicago, IL 60609  
773.537.3960  
773.537.3238

Mon-Fri  
9am-noon, 1pm-5pm

### 13. Humboldt Park Integrated Health Care Clinic

3240 West Division St.  
Chicago, Illinois 60651  
312.413.7425

Mon-Fri  
9am-noon, 1pm-5pm

## UIC College of Medicine

### 14. Family Medicine Center at the University Village Clinic

722 West Maxwell St.  
Suite 235  
Chicago, IL 60607

Mon 8am-5pm  
Tues 8am-9pm  
Wed 9:30am-5pm  
Thurs 8am-9pm  
Fri 7am-5pm  
Sat 9am-Noon

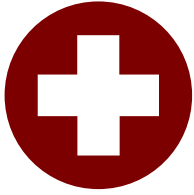

## 2 Keep track of doctor's visits + medications

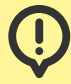

Bring this information when you talk to the pharmacist, your doctor or your peer coach.

This information is for your follow-up period.  
Get updated information from your primary doctor.

Visit <http://hospital.uillinois.edu/>, then click "For Patients + Visitors," then "Patient Information," then "My UI Health."

### *What's inside*

- 2A Appointment information
- 2B Medication routine
- 2C Your healthcare information

### *This information will help you...*

- ✓ keep track of your follow-up doctor's appointments
- ✓ maintain your new medication routine



Date of birth:

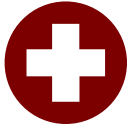

# 2A Appointment information for May 2016

Notes

| Su | M  | T  | W  | Th | F  | Sa |
|----|----|----|----|----|----|----|
| 1  | 2  | 3  | 4  | 5  | 6  | 7  |
| 8  | 9  | 10 | 11 | 12 | 13 | 14 |
| 15 | 16 | 17 | 18 | 19 | 20 | 21 |
| 22 | 23 | 24 | 25 | 26 | 27 | 28 |
| 29 | 30 | 31 |    |    |    |    |

## Support groups

Sickle Cell Center 312.996.5267

Mended Hearts  
Support Group  
for heart conditions 312.926.2070

Stroke Support Group 312.996.3700

COPD Foundation 866.316.COPD  
(2673)

University of Illinois  
Cancer Center 312.355.1625

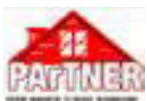

Date of birth:

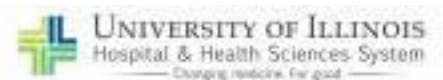

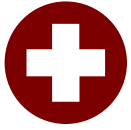

# 2A Appointment information for May 2016 continued

Notes

| Su | M  | T  | W  | Th | F  | Sa |
|----|----|----|----|----|----|----|
| 1  | 2  | 3  | 4  | 5  | 6  | 7  |
| 8  | 9  | 10 | 11 | 12 | 13 | 14 |
| 15 | 16 | 17 | 18 | 19 | 20 | 21 |
| 22 | 23 | 24 | 25 | 26 | 27 | 28 |
| 29 | 30 | 31 |    |    |    |    |

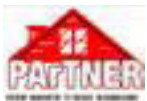

Date of birth:

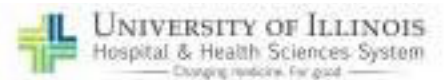



# 2A Appointment information for June 2016

Notes

| Su | M  | T  | W  | Th | F  | Sa |
|----|----|----|----|----|----|----|
|    |    |    | 1  | 2  | 3  | 4  |
| 5  | 6  | 7  | 8  | 9  | 10 | 11 |
| 12 | 13 | 14 | 15 | 16 | 17 | 18 |
| 19 | 20 | 21 | 22 | 23 | 24 | 25 |
| 26 | 27 | 28 | 29 | 30 |    |    |

## Healthy eating

3 tips for healthy eating:

- Eat more of certain foods and nutrients found in fruits, vegetables, whole grains, low-fat dairy products + seafood.
- Eat fewer foods with sodium, saturated fats, trans fats, cholesterol, added sugars + refined grains.
- Balance calories with physical activity to manage weight.



Date of birth:



# 2A Appointment information for June 2016 continued

Notes

| Su | M  | T  | W  | Th | F  | Sa |
|----|----|----|----|----|----|----|
|    |    |    | 1  | 2  | 3  | 4  |
| 5  | 6  | 7  | 8  | 9  | 10 | 11 |
| 12 | 13 | 14 | 15 | 16 | 17 | 18 |
| 19 | 20 | 21 | 22 | 23 | 24 | 25 |
| 26 | 27 | 28 | 29 | 30 |    |    |



Date of birth:



# 2A Appointment information for July 2016

Notes

| Su | M  | T  | W  | Th | F  | Sa |
|----|----|----|----|----|----|----|
|    |    |    |    |    | 1  | 2  |
| 3  | 4  | 5  | 6  | 7  | 8  | 9  |
| 10 | 11 | 12 | 13 | 14 | 15 | 16 |
| 17 | 18 | 19 | 20 | 21 | 22 | 23 |
| 24 | 25 | 26 | 27 | 28 | 29 | 30 |
| 31 |    |    |    |    |    |    |

## Control your blood pressure

- Take medication as prescribed.
- Follow a healthy diet.
- Reduce the salty foods you eat.
- Maintain a healthy weight.
- Get tested for sleeping problems.
- Reduce stress.



Date of birth:

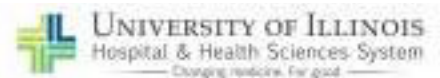



# 2A Appointment information for July 2016 continued

Notes

| Su | M  | T  | W  | Th | F  | Sa |
|----|----|----|----|----|----|----|
|    |    |    |    |    | 1  | 2  |
| 3  | 4  | 5  | 6  | 7  | 8  | 9  |
| 10 | 11 | 12 | 13 | 14 | 15 | 16 |
| 17 | 18 | 19 | 20 | 21 | 22 | 23 |
| 24 | 25 | 26 | 27 | 28 | 29 | 30 |
| 31 |    |    |    |    |    |    |



Date of birth:

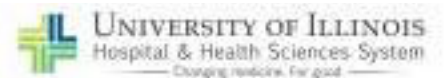





# 2A Appointment information for August 2016

Notes

| Su | M  | T  | W  | Th | F  | Sa |
|----|----|----|----|----|----|----|
|    | 1  | 2  | 3  | 4  | 5  | 6  |
| 7  | 8  | 9  | 10 | 11 | 12 | 13 |
| 14 | 15 | 16 | 17 | 18 | 19 | 20 |
| 21 | 22 | 23 | 24 | 25 | 26 | 27 |
| 28 | 29 | 30 | 31 |    |    |    |

## Quit smoking for good!

### *Stay motivated*

Make a list of reasons to quit and carry it with you.

### *Set a date*

Preparing for your quit date is key to starting a new, smoke-free life.

### *Find support*

Spend time with non-smokers and ex-smokers.

Tobacco Treatment Center 312.996.3300



Date of birth:

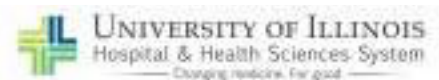



# 2A Appointment information for August 2016 continued

Notes

| Su | M  | T  | W  | Th | F  | Sa |
|----|----|----|----|----|----|----|
|    | 1  | 2  | 3  | 4  | 5  | 6  |
| 7  | 8  | 9  | 10 | 11 | 12 | 13 |
| 14 | 15 | 16 | 17 | 18 | 19 | 20 |
| 21 | 22 | 23 | 24 | 25 | 26 | 27 |
| 28 | 29 | 30 | 31 |    |    |    |



Date of birth:





# 2A Appointment information for September 2016

Notes

| Su | M  | T  | W  | Th | F  | Sa |
|----|----|----|----|----|----|----|
|    |    |    |    | 1  | 2  | 3  |
| 4  | 5  | 6  | 7  | 8  | 9  | 10 |
| 11 | 12 | 13 | 14 | 15 | 16 | 17 |
| 18 | 19 | 20 | 21 | 22 | 23 | 24 |
| 25 | 26 | 27 | 28 | 29 | 30 |    |

## What is medicaid?

Medicaid is a free or low-cost insurance plan based on income.

You are eligible if you earn an income of less than \$15,800 for an individual or \$32,500 for a family of 4.



Date of birth:



# 2A Appointment information for September 2016 continued

Notes

| Su | M  | T  | W  | Th | F  | Sa |
|----|----|----|----|----|----|----|
|    |    |    |    | 1  | 2  | 3  |
| 4  | 5  | 6  | 7  | 8  | 9  | 10 |
| 11 | 12 | 13 | 14 | 15 | 16 | 17 |
| 18 | 19 | 20 | 21 | 22 | 23 | 24 |
| 25 | 26 | 27 | 28 | 29 | 30 |    |



Date of birth:

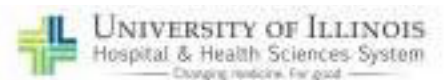



# 2A Appointment information for October 2016

Notes

| Su | M  | T  | W  | Th | F  | Sa |
|----|----|----|----|----|----|----|
|    |    |    |    |    |    | 1  |
| 2  | 3  | 4  | 5  | 6  | 7  | 8  |
| 9  | 10 | 11 | 12 | 13 | 14 | 15 |
| 16 | 17 | 18 | 19 | 20 | 21 | 22 |
| 23 | 24 | 25 | 26 | 27 | 28 | 29 |
| 30 | 31 |    |    |    |    |    |

## Prevent the flu

- Get a flu shot every year in the fall or winter months.
- Wash your hands often and well.
- Avoid being near people who are sick.
- Eat a healthy diet.



Date of birth:



# 2A Appointment information for October 2016

Notes

| Su | M  | T  | W  | Th | F  | Sa |
|----|----|----|----|----|----|----|
|    |    |    |    |    |    | 1  |
| 2  | 3  | 4  | 5  | 6  | 7  | 8  |
| 9  | 10 | 11 | 12 | 13 | 14 | 15 |
| 16 | 17 | 18 | 19 | 20 | 21 | 22 |
| 23 | 24 | 25 | 26 | 27 | 28 | 29 |
| 30 | 31 |    |    |    |    |    |



Date of birth:





# 2B *Keep track of doctor's visits + medications*

## Medication routine

 *This information is a guide only. Be sure to read instructions from your doctor and on the medication bottle.*

 Bring this information when you talk to the pharmacist, your doctor or your peer coach.

Ask your doctor if you should still be taking each of these medications and what each medication is taken for.

Morning  
Noon  
Evening  
Bedtime  
As needed

     Notes

Medication name

|                          |                          |                          |                          |                          |
|--------------------------|--------------------------|--------------------------|--------------------------|--------------------------|
| <input type="checkbox"/> | <input type="checkbox"/> | <input type="checkbox"/> | <input type="checkbox"/> | <input type="checkbox"/> |
|--------------------------|--------------------------|--------------------------|--------------------------|--------------------------|

|                          |                          |                          |                          |                          |
|--------------------------|--------------------------|--------------------------|--------------------------|--------------------------|
| <input type="checkbox"/> | <input type="checkbox"/> | <input type="checkbox"/> | <input type="checkbox"/> | <input type="checkbox"/> |
|--------------------------|--------------------------|--------------------------|--------------------------|--------------------------|

|                          |                          |                          |                          |                          |
|--------------------------|--------------------------|--------------------------|--------------------------|--------------------------|
| <input type="checkbox"/> | <input type="checkbox"/> | <input type="checkbox"/> | <input type="checkbox"/> | <input type="checkbox"/> |
|--------------------------|--------------------------|--------------------------|--------------------------|--------------------------|

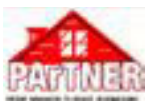

Date of birth:

Morning  
Noon  
Evening  
Bedtime  
As needed

Medication name

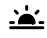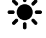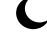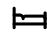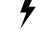

Notes

|                          |                          |                          |                          |                          |
|--------------------------|--------------------------|--------------------------|--------------------------|--------------------------|
| <input type="checkbox"/> | <input type="checkbox"/> | <input type="checkbox"/> | <input type="checkbox"/> | <input type="checkbox"/> |
|--------------------------|--------------------------|--------------------------|--------------------------|--------------------------|

|                          |                          |                          |                          |                          |
|--------------------------|--------------------------|--------------------------|--------------------------|--------------------------|
| <input type="checkbox"/> | <input type="checkbox"/> | <input type="checkbox"/> | <input type="checkbox"/> | <input type="checkbox"/> |
|--------------------------|--------------------------|--------------------------|--------------------------|--------------------------|

|                          |                          |                          |                          |                          |
|--------------------------|--------------------------|--------------------------|--------------------------|--------------------------|
| <input type="checkbox"/> | <input type="checkbox"/> | <input type="checkbox"/> | <input type="checkbox"/> | <input type="checkbox"/> |
|--------------------------|--------------------------|--------------------------|--------------------------|--------------------------|

|                          |                          |                          |                          |                          |
|--------------------------|--------------------------|--------------------------|--------------------------|--------------------------|
| <input type="checkbox"/> | <input type="checkbox"/> | <input type="checkbox"/> | <input type="checkbox"/> | <input type="checkbox"/> |
|--------------------------|--------------------------|--------------------------|--------------------------|--------------------------|

|                          |                          |                          |                          |                          |
|--------------------------|--------------------------|--------------------------|--------------------------|--------------------------|
| <input type="checkbox"/> | <input type="checkbox"/> | <input type="checkbox"/> | <input type="checkbox"/> | <input type="checkbox"/> |
|--------------------------|--------------------------|--------------------------|--------------------------|--------------------------|

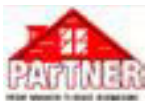

Date of birth:

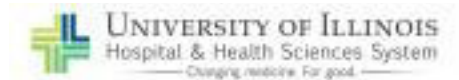



Morning  
Noon  
Evening  
Bedtime  
As needed

Medication name



Notes

|                          |                          |                          |                          |                          |
|--------------------------|--------------------------|--------------------------|--------------------------|--------------------------|
| <input type="checkbox"/> | <input type="checkbox"/> | <input type="checkbox"/> | <input type="checkbox"/> | <input type="checkbox"/> |
|--------------------------|--------------------------|--------------------------|--------------------------|--------------------------|

|                          |                          |                          |                          |                          |
|--------------------------|--------------------------|--------------------------|--------------------------|--------------------------|
| <input type="checkbox"/> | <input type="checkbox"/> | <input type="checkbox"/> | <input type="checkbox"/> | <input type="checkbox"/> |
|--------------------------|--------------------------|--------------------------|--------------------------|--------------------------|

|                          |                          |                          |                          |                          |
|--------------------------|--------------------------|--------------------------|--------------------------|--------------------------|
| <input type="checkbox"/> | <input type="checkbox"/> | <input type="checkbox"/> | <input type="checkbox"/> | <input type="checkbox"/> |
|--------------------------|--------------------------|--------------------------|--------------------------|--------------------------|

|                          |                          |                          |                          |                          |
|--------------------------|--------------------------|--------------------------|--------------------------|--------------------------|
| <input type="checkbox"/> | <input type="checkbox"/> | <input type="checkbox"/> | <input type="checkbox"/> | <input type="checkbox"/> |
|--------------------------|--------------------------|--------------------------|--------------------------|--------------------------|

|                          |                          |                          |                          |                          |
|--------------------------|--------------------------|--------------------------|--------------------------|--------------------------|
| <input type="checkbox"/> | <input type="checkbox"/> | <input type="checkbox"/> | <input type="checkbox"/> | <input type="checkbox"/> |
|--------------------------|--------------------------|--------------------------|--------------------------|--------------------------|

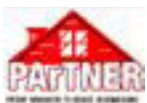

Date of birth:

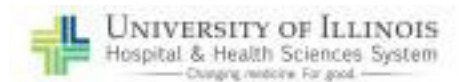

Medication name

Morning  
Noon  
Evening  
Bedtime  
As needed

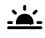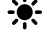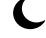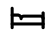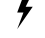

Notes

|                          |                          |                          |                          |                          |
|--------------------------|--------------------------|--------------------------|--------------------------|--------------------------|
| <input type="checkbox"/> | <input type="checkbox"/> | <input type="checkbox"/> | <input type="checkbox"/> | <input type="checkbox"/> |
|--------------------------|--------------------------|--------------------------|--------------------------|--------------------------|

|                          |                          |                          |                          |                          |
|--------------------------|--------------------------|--------------------------|--------------------------|--------------------------|
| <input type="checkbox"/> | <input type="checkbox"/> | <input type="checkbox"/> | <input type="checkbox"/> | <input type="checkbox"/> |
|--------------------------|--------------------------|--------------------------|--------------------------|--------------------------|

|                          |                          |                          |                          |                          |
|--------------------------|--------------------------|--------------------------|--------------------------|--------------------------|
| <input type="checkbox"/> | <input type="checkbox"/> | <input type="checkbox"/> | <input type="checkbox"/> | <input type="checkbox"/> |
|--------------------------|--------------------------|--------------------------|--------------------------|--------------------------|

|                          |                          |                          |                          |                          |
|--------------------------|--------------------------|--------------------------|--------------------------|--------------------------|
| <input type="checkbox"/> | <input type="checkbox"/> | <input type="checkbox"/> | <input type="checkbox"/> | <input type="checkbox"/> |
|--------------------------|--------------------------|--------------------------|--------------------------|--------------------------|

|                          |                          |                          |                          |                          |
|--------------------------|--------------------------|--------------------------|--------------------------|--------------------------|
| <input type="checkbox"/> | <input type="checkbox"/> | <input type="checkbox"/> | <input type="checkbox"/> | <input type="checkbox"/> |
|--------------------------|--------------------------|--------------------------|--------------------------|--------------------------|



Date of birth:

Medication name

Morning  
Noon  
Evening  
Bedtime  
As needed



Notes

|                          |                          |                          |                          |                          |
|--------------------------|--------------------------|--------------------------|--------------------------|--------------------------|
| <input type="checkbox"/> | <input type="checkbox"/> | <input type="checkbox"/> | <input type="checkbox"/> | <input type="checkbox"/> |
|--------------------------|--------------------------|--------------------------|--------------------------|--------------------------|

|                          |                          |                          |                          |                          |
|--------------------------|--------------------------|--------------------------|--------------------------|--------------------------|
| <input type="checkbox"/> | <input type="checkbox"/> | <input type="checkbox"/> | <input type="checkbox"/> | <input type="checkbox"/> |
|--------------------------|--------------------------|--------------------------|--------------------------|--------------------------|

|                          |                          |                          |                          |                          |
|--------------------------|--------------------------|--------------------------|--------------------------|--------------------------|
| <input type="checkbox"/> | <input type="checkbox"/> | <input type="checkbox"/> | <input type="checkbox"/> | <input type="checkbox"/> |
|--------------------------|--------------------------|--------------------------|--------------------------|--------------------------|

|                          |                          |                          |                          |                          |
|--------------------------|--------------------------|--------------------------|--------------------------|--------------------------|
| <input type="checkbox"/> | <input type="checkbox"/> | <input type="checkbox"/> | <input type="checkbox"/> | <input type="checkbox"/> |
|--------------------------|--------------------------|--------------------------|--------------------------|--------------------------|

|                          |                          |                          |                          |                          |
|--------------------------|--------------------------|--------------------------|--------------------------|--------------------------|
| <input type="checkbox"/> | <input type="checkbox"/> | <input type="checkbox"/> | <input type="checkbox"/> | <input type="checkbox"/> |
|--------------------------|--------------------------|--------------------------|--------------------------|--------------------------|



Date of birth:



Medication name

Morning  
Noon  
Evening  
Bedtime  
As needed



Notes



Date of birth:

Medication name

Morning  
Noon  
Evening  
Bedtime  
As needed



Notes



Date of birth:

Medication name

Morning  
Noon  
Evening  
Bedtime  
As needed



Notes

|                          |                          |                          |                          |                          |
|--------------------------|--------------------------|--------------------------|--------------------------|--------------------------|
| <input type="checkbox"/> | <input type="checkbox"/> | <input type="checkbox"/> | <input type="checkbox"/> | <input type="checkbox"/> |
|--------------------------|--------------------------|--------------------------|--------------------------|--------------------------|

|                          |                          |                          |                          |                          |
|--------------------------|--------------------------|--------------------------|--------------------------|--------------------------|
| <input type="checkbox"/> | <input type="checkbox"/> | <input type="checkbox"/> | <input type="checkbox"/> | <input type="checkbox"/> |
|--------------------------|--------------------------|--------------------------|--------------------------|--------------------------|

|                          |                          |                          |                          |                          |
|--------------------------|--------------------------|--------------------------|--------------------------|--------------------------|
| <input type="checkbox"/> | <input type="checkbox"/> | <input type="checkbox"/> | <input type="checkbox"/> | <input type="checkbox"/> |
|--------------------------|--------------------------|--------------------------|--------------------------|--------------------------|

|                          |                          |                          |                          |                          |
|--------------------------|--------------------------|--------------------------|--------------------------|--------------------------|
| <input type="checkbox"/> | <input type="checkbox"/> | <input type="checkbox"/> | <input type="checkbox"/> | <input type="checkbox"/> |
|--------------------------|--------------------------|--------------------------|--------------------------|--------------------------|

|                          |                          |                          |                          |                          |
|--------------------------|--------------------------|--------------------------|--------------------------|--------------------------|
| <input type="checkbox"/> | <input type="checkbox"/> | <input type="checkbox"/> | <input type="checkbox"/> | <input type="checkbox"/> |
|--------------------------|--------------------------|--------------------------|--------------------------|--------------------------|



Date of birth:

Medication name

Morning  
Noon  
Evening  
Bedtime  
As needed



Notes

|                          |                          |                          |                          |                          |
|--------------------------|--------------------------|--------------------------|--------------------------|--------------------------|
| <input type="checkbox"/> | <input type="checkbox"/> | <input type="checkbox"/> | <input type="checkbox"/> | <input type="checkbox"/> |
|--------------------------|--------------------------|--------------------------|--------------------------|--------------------------|

|                          |                          |                          |                          |                          |
|--------------------------|--------------------------|--------------------------|--------------------------|--------------------------|
| <input type="checkbox"/> | <input type="checkbox"/> | <input type="checkbox"/> | <input type="checkbox"/> | <input type="checkbox"/> |
|--------------------------|--------------------------|--------------------------|--------------------------|--------------------------|

|                          |                          |                          |                          |                          |
|--------------------------|--------------------------|--------------------------|--------------------------|--------------------------|
| <input type="checkbox"/> | <input type="checkbox"/> | <input type="checkbox"/> | <input type="checkbox"/> | <input type="checkbox"/> |
|--------------------------|--------------------------|--------------------------|--------------------------|--------------------------|

|                          |                          |                          |                          |                          |
|--------------------------|--------------------------|--------------------------|--------------------------|--------------------------|
| <input type="checkbox"/> | <input type="checkbox"/> | <input type="checkbox"/> | <input type="checkbox"/> | <input type="checkbox"/> |
|--------------------------|--------------------------|--------------------------|--------------------------|--------------------------|

|                          |                          |                          |                          |                          |
|--------------------------|--------------------------|--------------------------|--------------------------|--------------------------|
| <input type="checkbox"/> | <input type="checkbox"/> | <input type="checkbox"/> | <input type="checkbox"/> | <input type="checkbox"/> |
|--------------------------|--------------------------|--------------------------|--------------------------|--------------------------|



Date of birth:

Medication name

Morning  
Noon  
Evening  
Bedtime  
As needed



Notes

|                          |                          |                          |                          |                          |
|--------------------------|--------------------------|--------------------------|--------------------------|--------------------------|
| <input type="checkbox"/> | <input type="checkbox"/> | <input type="checkbox"/> | <input type="checkbox"/> | <input type="checkbox"/> |
|--------------------------|--------------------------|--------------------------|--------------------------|--------------------------|

|                          |                          |                          |                          |                          |
|--------------------------|--------------------------|--------------------------|--------------------------|--------------------------|
| <input type="checkbox"/> | <input type="checkbox"/> | <input type="checkbox"/> | <input type="checkbox"/> | <input type="checkbox"/> |
|--------------------------|--------------------------|--------------------------|--------------------------|--------------------------|

|                          |                          |                          |                          |                          |
|--------------------------|--------------------------|--------------------------|--------------------------|--------------------------|
| <input type="checkbox"/> | <input type="checkbox"/> | <input type="checkbox"/> | <input type="checkbox"/> | <input type="checkbox"/> |
|--------------------------|--------------------------|--------------------------|--------------------------|--------------------------|

|                          |                          |                          |                          |                          |
|--------------------------|--------------------------|--------------------------|--------------------------|--------------------------|
| <input type="checkbox"/> | <input type="checkbox"/> | <input type="checkbox"/> | <input type="checkbox"/> | <input type="checkbox"/> |
|--------------------------|--------------------------|--------------------------|--------------------------|--------------------------|

|                          |                          |                          |                          |                          |
|--------------------------|--------------------------|--------------------------|--------------------------|--------------------------|
| <input type="checkbox"/> | <input type="checkbox"/> | <input type="checkbox"/> | <input type="checkbox"/> | <input type="checkbox"/> |
|--------------------------|--------------------------|--------------------------|--------------------------|--------------------------|



Date of birth:





# 2C *Keep track of doctor's visits + medications* Your healthcare information

 Bring this information when you talk to the pharmacist, your doctor or your peer coach.

*For physician  
use:*

## Hospitalization summary

Patient name:  
Medical record #:  
Date of birth:  
Admission date:  
Discharge date:  
Primary discharge diagnosis:

*For patient  
reference:*

## Insurance

Insurance type:  
Insurance #:  
Insurance phone #:  
Insurance care coordinator:

## Pharmacy

Pharmacy:  
Address:  
Pharmacy phone #:  
Hours:



Date of birth:

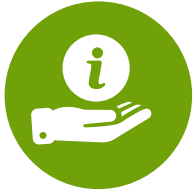

# 3 Find support in your community

 Have this information when you talk to your navigator or peer coach.

## *What's inside*

3A Resources for you

3B Community resources

## *This information will help you...*

- ✓ gain access to resources you need
- ✓ keep track of resources you are in the process of getting
- ✓ get the most out of your navigator visit and peer coach phone calls

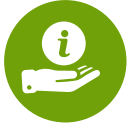

---

# 3A *Find support in your community* Resources for you

---

Category

Resource + description

Contact information



Date of birth:



---

Category

Resource + description

Contact information



Date of birth:

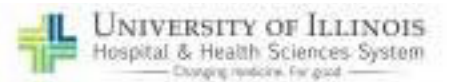



# 3B *Find support in your community* General resources

## Transportation

**First Transit**  
*Non-emergency transportation services for patients with Medicaid*

**Contact information**  
877.725.0569  
Mon-Fri 8am-5pm

**ADA Paratransit**  
*For patients with disabilities*

312.663.HELP (4357)  
TTY: 312.913.3122

## Childcare

**Children's programs at Greater Food Repository**

773.247.3663

## Housing

**Chicago Department of Family and Support Services**

**Garfield Center**  
312.746.5400

**North Side Center**  
312.744.2580

**South Chicago Center**  
312.747.0331

**King Center (South side)**  
312.747.2300

**Englewood (South side)**  
312.747.0200

**Trina Davila (North side)**  
312.744.2014

**Department of Human Services**

312.746.5400

**CEDA Home Energy Bill Payment Assistance**

800.571.2332  
call for a referral CEDA intake site near you



---

|             |                                                                      |                                           |
|-------------|----------------------------------------------------------------------|-------------------------------------------|
| <b>Food</b> | Greater Chicago Food Depository<br><i>Ask for SNAP Outreach Team</i> | 773.247.FOOD (3663)<br>Mon-Fri 8:30am-5pm |
|             | Illinois Hunger Coalition                                            | 800.359.2163                              |

---

|                   |                                |                                                                                           |
|-------------------|--------------------------------|-------------------------------------------------------------------------------------------|
| <b>Healthcare</b> | National Tobacco Quit Line     | 1.800.QUIT.NOW (1.800.784.8669)                                                           |
|                   | <u>UI Health</u>               |                                                                                           |
|                   | Dental + Oral Care clinic      | 312.996.7555                                                                              |
|                   | Eye + Ear Infirmary            | 312.996.6590                                                                              |
|                   | Family Medicine Center         | 800.866.CARE                                                                              |
|                   | Neuropsychiatry and Psychology | 312.996.7723                                                                              |
|                   | Hospital + Emergency Room      | 800.866.CARE                                                                              |
|                   | Sickle Cell Center             | 312.413.8666                                                                              |
|                   | Heart Failure Program          | 312.413.8443                                                                              |
|                   | Lung Health Program            | 312.996.3300                                                                              |
|                   | Tobacco Treatment Center       | 312.996.3300                                                                              |
|                   | Cancer Center                  | <u>New patients</u><br>866.600.CARE                                                       |
|                   |                                | <u>Existing patients</u><br>312.355.1625 (Cancer center)<br>312.355.4300 (Surgery Center) |

---

|                    |                      |     |
|--------------------|----------------------|-----|
| <b>Other needs</b> | Non-emergency police | 311 |
|--------------------|----------------------|-----|

---

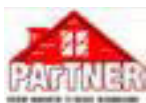

Supplement: mmc1.pdf [file mmc1.pdf]
